# 1 **M-DATA: A Statistical Approach to Jointly Analyzing *De Novo***

## 2 **Mutations for Multiple Traits**

3 Yuhan Xie<sup>1#</sup>, Mo Li<sup>1#</sup>, Weilai Dong<sup>2</sup>, Wei Jiang<sup>1</sup>, Hongyu Zhao<sup>1,3\*</sup>

4

5 <sup>1</sup> Department of Biostatistics, Yale School of Public Health, New Haven, CT, USA 06510

6 <sup>2</sup> Department of Genetics, Yale School of Medicine, New Haven, CT, USA 06510

7 <sup>3</sup> Program in Computational Biology and Bioinformatics, Yale University, New Haven, CT, USA

8 06511

9

10 # These authors contributed to this work equally

11 \* To whom correspondence should be addressed:

12 Prof Hongyu Zhao

13 Department of Biostatistics, Yale School of Public Health, 60 College Street, New Haven, CT,

14 06520, USA

15 Email: [hongyu.zhao@yale.edu](mailto:hongyu.zhao@yale.edu)

16

17

18

19

20

21

22

23

24

25

## 26 **Abstract**

27 Recent studies have demonstrated that multiple early-onset diseases have shared risk genes,  
28 based on findings from *de novo* mutations (DNMs). Therefore, we may leverage information  
29 from one trait to improve statistical power to identify genes for another trait. However, there are  
30 few methods that can jointly analyze DNMs from multiple traits. In this study, we develop a  
31 framework called M-DATA (**M**ulti-trait framework for **D**e **n**ovo mutation **A**ssociation **T**est with  
32 **A**nnotations) to increase the statistical power of association analysis by integrating data from  
33 multiple correlated traits and their functional annotations. Using the number of DNMs from  
34 multiple diseases, we develop a method based on an Expectation-Maximization algorithm to  
35 both infer the degree of association between two diseases as well as to estimate the gene  
36 association probability for each disease. We apply our method to a case study of jointly  
37 analyzing data from congenital heart disease (CHD) and autism. Our method was able to  
38 identify 23 genes for CHD from joint analysis, including 12 novel genes, which is substantially  
39 more than single-trait analysis, leading to novel insights into CHD disease etiology.

40

## 41 **Author Summary**

42 Congenital heart disease (CHD) is the most common birth defect. With the development of new  
43 generation sequencing technology, germline mutations such as *de novo* mutations (DNMs) with  
44 deleterious effects can be identified to aid in discovering the genetic causes for early on-set  
45 diseases such as CHD. However, the statistical power is still limited by the small sample size of  
46 DNM studies due to the high cost of recruiting and sequencing samples, and the low occurrence  
47 of DNMs given its rarity. Compared to DNM analysis for other diseases, it is even more  
48 challenging for CHD given its genetic heterogeneity. Recent research has suggested shared  
49 disease mechanisms between early-onset neurodevelopmental diseases and CHD based on

50 findings from DNMs. Currently, there are few methods that can jointly analyze DNM data on  
51 multiple traits. Therefore, we develop a framework to identify risk genes for multiple traits  
52 simultaneously for DNM data. The new method is applied to CHD and autism as a case study to  
53 demonstrate its improved power in identifying risk genes compared with single-trait analysis.  
54 Our results lead to new insights on the disease etiology of CHD, and the shared etiological  
55 mechanisms between CHD and autism.

56

57

58

59

60

61

62

63

64

65

66

67

68

69

70

71

72

## 73 Introduction

74 Congenital heart disease (CHD) is the most common birth defect. It affects 0.8% of live birth  
75 and accounts for one-third of all major congenital abnormalities [1, 2]. CHD is associated with  
76 both genetic and environmental factors [2]. It is genetically heterogenous and the estimated  
77 heritability in a Danish twin study is close to 0.5 [3].

78  
79 Studies on *de novo* mutations (DNMs) have been successful in identifying risk genes for early  
80 on-set diseases as DNMs with deleterious effects have not been through natural selection. By  
81 conducting whole-exome sequencing (WES) studies for parent-offspring trios, there are  
82 cumulative findings of potential risk genes for CHD and neurodevelopmental disorders by  
83 identifying genes with more DNMs than expected by chance [4-6]. However, the statistical  
84 power for identifying risk genes is still hampered by the limited sample size of WES due to its  
85 relatively high cost in recruiting and sequencing samples, as well as the low occurrence of  
86 DNMs given its rarity.

87  
88 Meta-analysis and joint analysis are two major approaches to improve the statistical power by  
89 integrating information from different studies. Meta-analysis studies on WES DNMs and  
90 Genome-wide Association Studies (GWAS) for multiple traits have been conducted [7, 8].  
91 However, these approaches may overlook the heterogeneity among traits, thus hinder the ability  
92 to interpret finding for each single trait. By identifying the intersection of top genes from multiple  
93 traits, some recent studies have shown that there are shared risk genes between CHD and  
94 autism [9, 10]. Shared disease mechanism for early-onset neurodevelopmental diseases has  
95 also been reported [11, 12]. Based on these findings, joint analysis methods have been  
96 proposed and gained success in GWAS and expression quantitative trait loci (eQTL) studies.  
97 Studies have shown that multi-trait analysis can improve statistical power [13-19] and accuracy

98 of genetic risk prediction [20-22]. Currently, there lacks joint analysis methods to analyze DNM  
99 data on multiple traits globally, with the exception of mTADA [23].

100

101 In addition to joint analysis, integrating functional annotations has also been shown to improve  
102 statistical power in GWAS [15, 24] and facilitate the analysis of sequencing studies [25] [26].

103 There is a growing number of publicly available tools to annotate mutations in multiple  
104 categories, such as the genomic conservation, epigenetic marks, protein functions and human  
105 health. With these resources, there is a need to develop a statistical framework for jointly  
106 analyzing traits with shared genetic architectures and integrating functional annotations for DNM  
107 data.

108

109 In this article, we propose a **Multi-trait *De novo* mutation Association Test with Annotations**,  
110 named M-DATA, to identify risk genes for multiple traits simultaneously based on pleiotropy and  
111 functional annotations. We demonstrate the performance of M-DATA through extensive  
112 simulation studies and real data examples. Through simulations, we illustrate that M-DATA is  
113 able to accurately estimate the proportion of disease-causing genes between two traits under  
114 various genetic architectures. M-DATA outperformed single-trait approaches and methods even  
115 if annotation information was not used. Annotations can further boost the power of M-DATA. We  
116 applied M-TADA to identify risk genes for CHD and autism. There are 23 genes discovered to  
117 be significant for CHD, including 12 novel genes, bringing novel insight to the disease etiology  
118 of CHD.

119

120

121

122

## 123 **Methods**

### 124 ***Probabilistic model***

125 First, we consider the simplest case with only one trait, and then we extend our model to  
126 multiple traits. We denote  $Y_i$  as the DNM count for gene  $i$  in a case cohort, and assume  $Y_i$  come  
127 from the mixture of null ( $H_0$ ), and non-null ( $H_1$ ), with proportion  $\pi_0 = 1 - \pi$  and  $\pi_1 = \pi$   
128 respectively. Let  $Z_i$  be the latent binary variable indicating whether this gene is associated with  
129 the trait of interest, where  $Z_i = 0$  means gene  $i$  is unassociated ( $H_0$ ), and  $Z_i = 1$  means gene  $i$   
130 is associated ( $H_1$ ). Then, we have the following model:

$$Z_i \sim \text{Bernoulli}(\pi)$$

$$Y_i | Z_i = 0 \sim \text{Poisson}(2N\mu_i)$$

$$Y_i | Z_i = 1 \sim \text{Poisson}(2N\mu_i\gamma_i)$$

131 where  $N$  is the sample size of the case cohort,  $\mu_i$  is the mutability of gene  $i$  estimated using the  
132 framework in Samocha, Robinson (27), and  $\gamma_i$  is the relative risk of the DNMs in the risk gene  
133 and is assumed to be larger than 1. The derivation of the parameter of the Poisson distribution  
134 is the same as that in TADA [6, 28]. We define this model as the single-trait model without  
135 annotation in our main text.

136

137 To leverage information from functional annotations, we use an exponential link between  $\gamma_i$  and  
138  $X_i$ ,

$$\gamma_i = \exp(X_i^T \beta),$$

139 where  $X_i^T$  is the transpose of the functional annotation vector of gene  $i$ , and  $\beta$  is the effect size  
140 vector of the functional annotations. Under the assumption that risk genes have higher burden  
141 than non-risk genes, we expect the estimated value of  $\gamma_i$  to be larger than 1.

142

143 Now we extend our model to consider multiple traits simultaneously. To unclutter our notations,  
 144 we present the model for the two-trait case. Suppose we have gene counts  $Y_{i1}$  and  $Y_{i2}$  for gene  
 145  $i$  from two cohorts with different traits. Similarly, we introduce latent variables  
 146  $Z_i = [Z_{i00}, Z_{i10}, Z_{i01}, Z_{i11}]$  to indicate whether gene  $i$  is associated with the traits. Specifically,  
 147  $Z_{i00} = 1$  means the gene  $i$  is associated with neither trait,  $Z_{i10} = 1$  means that it is only  
 148 associated with the first trait,  $Z_{i01} = 1$  means that it is only associated with the second trait, and  
 149  $Z_{i11} = 1$  means that it is associated with both traits. Then, we have:

$$150 \quad Z_i \sim \text{Multinomial}(1, \pi), \text{ with } \pi = (\pi_{00}, \pi_{10}, \pi_{01}, \pi_{11})$$

$$151 \quad \pi_{00} = \Pr(Z_{i00} = 1), Y_{i1}|Z_{i00} \sim \text{Poisson}(2N_1\mu_i), Y_{i2}|Z_{i00} \sim \text{Poisson}(2N_2\mu_i)$$

$$152 \quad \pi_{10} = \Pr(Z_{i10} = 1), Y_{i1}|Z_{i10} \sim \text{Poisson}(2N_1\mu_i\gamma_{i1}), Y_{i2}|Z_{i10} \sim \text{Poisson}(2N_2\mu_i)$$

$$153 \quad \pi_{01} = \Pr(Z_{i01} = 1), Y_{i1}|Z_{i01} \sim \text{Poisson}(2N_1\mu_i), Y_{i2}|Z_{i01} \sim \text{Poisson}(2N_2\mu_i\gamma_{i2})$$

$$154 \quad \pi_{11} = \Pr(Z_{i11} = 1), Y_{i1}|Z_{i11} \sim \text{Poisson}(2N_1\mu_i\gamma_{i1}), Y_{i2}|Z_{i11} \sim \text{Poisson}(2N_2\mu_i\gamma_{i2})$$

$$155 \quad \gamma_{i1} = \exp(X_{i1}^T \beta_1), \gamma_{i2} = \exp(X_{i2}^T \beta_2)$$

156 where  $\pi$  is the corresponding risk proportion of genes belonging to each class, with  
 157  $\sum_{l \in \{00, 10, 01, 11\}} \pi_l = 1$ . Then, the risk proportion of the first trait and second trait is  $\pi_{10} + \pi_{11}$  and  
 158  $\pi_{01} + \pi_{11}$ , respectively. When there is no pleiotropy of the two traits,  $\pi_{11} = (\pi_{10} + \pi_{11})(\pi_{01} +$   
 159  $\pi_{11})$ . The difference between  $\pi_{11}$  and  $(\pi_{10} + \pi_{11})(\pi_{01} + \pi_{11})$  reflects the magnitude of global  
 160 pleiotropy between the two traits.  $\mu_i$  is the same as our one-trait model.  $N_1, \gamma_{i1}$  and  $X_{i1}$  are the  
 161 case cohort size, relative risk and annotation vector of gene  $i$  for the first trait.  $N_2, \gamma_{i2}$  and  $X_{i2}$  are  
 162 similarly defined for the second trait.

163  
 164 Denote  $\theta = (\pi, \beta_1, \beta_2)$  the parameters to be estimated in our model. As we only consider *de*  
 165 *novo* mutations, they can be treated as independent as they occur with very low frequency. The  
 166 full likelihood function can be written as

$$L(\theta) = \prod_{i=1}^M \sum_{l \in \{00,10,01,11\}} [\pi_l \Pr(Y_{i1}, Y_{i2} | Z_{il} = 1; \theta)]^{Z_{il}}$$

167 where M is the number of genes. The log-likelihood function is

$$l(\theta) = \sum_{i=1}^M \log \sum_{l \in \{00,10,01,11\}} [\pi_l \Pr(Y_{i1}, Y_{i2} | Z_{il} = 1; \theta)]^{Z_{il}}.$$

168

### 169 **Estimation**

170 Parameters of our models can be estimated using the Expectation-Maximization (EM) algorithm

171 [32]. It is very computationally efficient for our model without annotation because we have

172 explicit solutions for the estimation of all parameters in the M-step.

173

174 By Jensen's inequality, the lower bound  $Q(\theta)$  of the log-likelihood function is

$$l(\theta) \geq Q(\theta) = \sum_{i=1}^M \sum_{l \in \{00,10,01,11\}} [Z_{il} [\log(\pi_l) + \log(\Pr(Y_{i1}, Y_{i2} | Z_{il} = 1; \theta))]].$$

175

176 The algorithm has two steps. In the E-step, we update the estimation of latent variables

177  $Z_{il}, l \in \{00,01,10,11\}$  by its posterior probability under the current parameter estimates in round  $s$ .

178 That is,

$$\begin{aligned} Z_{il}^{(s)} &= \Pr(Z_{il} = 1 | Y_{i1}, Y_{i2}; \theta^{(s)}) = \frac{\Pr(Z_{il} = 1, Y_{i1}, Y_{i2} | \theta^{(s)})}{\Pr(Y_i | \theta^{(s)})} \\ &= \frac{\Pr(Z_{il} = 1 | \theta^{(s)}) \Pr(Y_{i1}, Y_{i2} | Z_{il} = 1; \theta^{(s)})}{\sum_{l' \in \{00,01,10,11\}} [\Pr(Z_{il'} = 1 | \theta^{(s)}) \Pr(Y_{i1}, Y_{i2} | Z_{il'} = 1; \theta^{(s)})]}. \end{aligned}$$

179

180 In the M-step, we update the parameters in  $\theta$  based on the estimation of  $Z_{il}$  in the E-step by

181 maximizing  $Q(\theta)$ . For  $\pi$ , there is an analytical solution, which is



$$\pi_l^{(s+1)} = \frac{\sum_{i=1}^M Z_{il}^{(s)}}{M}$$

182

183 For the rest of derivation, we take the estimation process for the first trait as an example. Taking  
 184 the first order derivative of  $Q(\theta)$  with respect to  $\beta_1$  as 0, we have

$$185 \quad d_{\beta_1} Q(\theta)^{(s)} = \sum_{i=1}^M (Z_{i10} + Z_{i11}) (Y_{i1} X_{i1} - 2N_1 \mu_i \exp(X_{i1}^T \beta_1) X_{i1}) = 0.$$

186

187 If we do not add any functional annotations to our model ( $X_{i1}$  degenerates to 1 and  $\beta_1$   
 188 degenerates to a scalar), there exists an analytical solution for  $\beta_1$ .

$$\beta_1^{(s+1)} = \log \frac{\sum_{i=1}^M Y_{i1} (Z_{i10} + Z_{i11})}{\sum_{i=1}^M 2N_1 \mu_i (Z_{i10} + Z_{i11})}$$

189

190 However, there is no explicit solution for  $\beta_1$ , so we adopt the Newton-Raphson method for  
 191 estimation after adding functional annotations into our model. The second-order derivatives for  
 192  $Q(\theta)$  is

$$d_{\beta_1}^2 Q(\theta) = - \sum_{i=1}^M (Z_{i10} + Z_{i11}) (2N_1 \mu_i \exp(X_{i1}^T \beta_1) X_{i1} X_{i1}^T),$$

193 Then, the estimate of  $\beta_1$  can be obtained as

$$\beta_1^{(s+1)} = \beta_1^{(s)} - [d_{\beta_1}^2 Q(\theta)^{(s)}]^{-1} d_{\beta_1} Q(\theta)^{(s)},$$

194

### 195 **Functional Annotation and Feature Selection**

196 As we have discussed, there are multiple sources of functional annotations for DNMs. For gene-  
 197 level annotations, we can directly plug into our gene-based model. For variant-level annotations,  
 198 it is important to collapse the variant-level information into gene-level without diluting useful  
 199 information. Simply pulling over variant-level annotations of all base pairs within a gene may not  
 200 be the best approach. To better understand the relationship, we calculate the likelihood ratio of

201 the DNM counts under  $H_1$  and  $H_0$ . Under  $H_1$ , for all positions  $t$  within a gene  $i$ , the DNM count  
 202  $Y_{it}$  follows the Poisson distribution with relative risk  $\gamma_{it}$  and mutability  $\mu_{it}$ , then we have

$$\frac{P(Y_i|H_1)}{P(Y_i|H_0)} = \frac{\prod_t P(Y_{it}|H_1)}{\prod_t P(Y_{it}|H_0)} = \frac{\prod_t \text{Poisson}(2N\mu_{it}\gamma_{it})}{\prod_t \text{Poisson}(2N\mu_{it})},$$

203 where  $\gamma_{it} = \exp(\beta_0 + \beta_1 X_{it})$ . There is likely to be at most one mutation at each position  $t$  due to  
 204 the low frequency of DNM. We can further simplify the above equation to

$$\begin{aligned} \frac{P(Y_i|H_1)}{P(Y_i|H_0)} &= \frac{\prod_t \exp(\beta_0 + \beta_1 X_{it} I\{Y_{it} = 1\}) \exp(-2N\mu_{it} \exp(\beta_0 + \beta_1 X_{it}))}{\prod_t \exp(-2N\mu_{it})} \\ &= \exp\left(\sum_t (\beta_0 + \beta_1 X_{it} I\{Y_{it} = 1\})\right) \exp\left(\sum_t -2N\mu_{it} [\exp(\beta_0 + \beta_1 X_{it}) - 1]\right) \end{aligned}$$

205  
 206 Assuming the variant-level effect size  $\beta_1$  is small, we can apply Taylor expansion to the second  
 207 term of the above equation,

$$\frac{P(Y_i|H_1)}{P(Y_i|H_0)} \approx \exp\left(\sum_t (\beta_0 + \beta_1 X_{it} I\{Y_{it} = 1\})\right) \exp\left(\sum_t -2N\mu_{it} [\exp(\beta_0)(1 + \beta_1 X_{it}) - 1]\right).$$

208  
 209 If we center the collapsed variant-level annotations, we can apply  $\sum_t X_{it} = 0$  to the above  
 210 equation and further simplify it as

$$\begin{aligned} \frac{P(Y_i|H_1)}{P(Y_i|H_0)} &\approx \exp\left(\sum_t (\beta_0 + \beta_1 X_{it} I\{Y_{it} = 1\})\right) \exp\left(\sum_t -2N\mu_{it} [\exp(\beta_0) - 1]\right) \\ &= \exp(\beta'_0 + \beta'_1 \sum_t (X_{it} I\{Y_{it} = 1\})). \end{aligned}$$

211  
 212 The above approximation motivates us to aggregate variant-level annotations to gene-level  
 213 annotations by summing up all annotation values of the mutations within a gene after  
 214 preprocessing each variant-level annotation.

215

216 We used variant-level annotations from ANNOVAR [29] in our analysis. We define loss-of-  
217 function (LoF) as frameshift insertion/deletion, splice site alteration, stopgain and stoploss  
218 predicated by ANNOVAR, and define deleterious missense variants (Dmis) predicted by  
219 MetaSVM [30]. Specifically, we included four categories of features including variant-level  
220 deleteriousness (PolyPhen (D), PolyPhen(P) [33], MPC [34], CADD [35], REVEL [36], and LoF),  
221 variant-level allele frequencies (gnomAD\_exome and gnomAD\_genome [31]), variant-level  
222 splicing scores (dbscSNV\_ADA\_score, dbscSNV\_RF\_score [37] and dpsi\_zscore [38]) and  
223 gene conservation scores (pLI and mis\_z) downloaded from gnomAD v2.1.1 [31] in real data  
224 analysis. To construct gene-level annotation scores, variant-level annotations were collapsed by  
225 summing up values calculated from the mutation information for each gene. All continuous  
226 gene-level features were normalized before model fitting.

227  
228 Before performing multi-trait analysis, features were selected separately for each trait by single-  
229 trait analysis. For each trait, all gene-level features were evaluated by Pearson's correlation. If  
230 the Pearson's correlation between two annotations was larger than 0.7, only one annotation was  
231 kept. After model fitting, we kept annotations with the absolute values of effect sizes larger than  
232 0.01 and refit the model with the selected annotations. For multi-trait analyses, we constructed  
233 the annotation matrices using the features selected from each trait (see more details in the S1  
234 Text.)

235

### 236 ***Hypothesis Testing***

237 Without loss of generality, we take the first trait as an example to illustrate our testing procedure.  
238 After we estimate the parameters, genes can be prioritized based on their joint local false  
239 discovery rate (Jlfd<sub>r</sub>) [39]. For joint analysis of two traits, the Jlfd<sub>r</sub> of whether gene  $i$  is  
240 associated with the first trait is

$$\begin{aligned}
 \text{Jlfd}r_1(Y_{i1}, Y_{i2}) &= \Pr(Z_{i00} + Z_{i01} = 1 | Y_{i1}, Y_{i2}) \\
 &= \frac{\pi_{00} \Pr(Y_{i1}, Y_{i2} | Z_{i00} = 1; \theta) + \pi_{01} \Pr(Y_{i1}, Y_{i2} | Z_{i01} = 1; \theta)}{\sum_{l' \in \{00, 01, 10, 11\}} \left[ \pi_{l'} \Pr(Y_{i1}, Y_{i2} | Z_{il'} = 1; \theta) \right]} \\
 &= \frac{\pi_{00} \text{Poisson}(Y_{i1}, 2N_1\mu_i) \text{Poisson}(Y_{i2}, 2N_2\mu_i) + \pi_{01} \text{Poisson}(Y_{i1}, 2N_1\mu_i) \text{Poisson}(Y_{i2}, 2N_2\mu_i Y_{i2})}{\sum_{l' \in \{00, 01, 10, 11\}} \left[ \pi_{l'} \Pr(Y_{i1}, Y_{i2} | Z_{il'} = 1; \theta) \right]},
 \end{aligned}$$

241 where  $\gamma_{i1} = \exp(X_{i1}^T \beta_1)$  and  $\gamma_{i2} = \exp(X_{i2}^T \beta_2)$ . When there is no annotation, both  $\beta_1$  and  $\beta_2$   
 242 degrade from vectors to single intercept values. Then  $\gamma_{i1}$  and  $\gamma_{i2}$  share the same values  $\exp(\beta_1)$   
 243 and  $\exp(\beta_2)$  across all genes. Same formula can be used to compute the Jlfd<sub>r</sub> of each gene.  
 244 The definition of the Jlfd<sub>r</sub> is the posterior probability of a null hypothesis being true, given the  
 245 observed DNM count vector  $(Y_1, Y_2)$ . If we consider the first trait, the corresponding null  
 246 hypothesis is the gene  $i$  associates with both traits or only associates with the second trait, i.e.,  
 247  $Z_{i00} + Z_{i01} = 1$ . And the corresponding Jlfd<sub>r</sub> is  $\text{Jlfd}r_1(Y_{i1}, Y_{i2}) = \Pr(Z_{i00} + Z_{i01} = 1 | Y_{i1}, Y_{i2})$ . In  
 248 comparison, the  $p$ -value is defined as the probability of observing more extreme results given  
 249 the null hypothesis being true, i.e.,  $p\text{-value} = \Pr(\text{More extreme than } (Y_{i1}, Y_{i2}) | Z_{i00} + Z_{i01} = 1)$ . To  
 250 compute it, we need to firstly define a partial order for comparing two-dimensional vector  $(Y_1, Y_2)$ ,  
 251 with which the genes associate with the first trait can stand out. One way to define the partial  
 252 order is to summarize the vector into a one-dimensional test statistic. Since this is not our focus,  
 253 we will not discuss how to derive a new test statistic in the article. Although the Jlfd<sub>r</sub> already  
 254 informs the probability of whether the gene is associated with the first trait, we should not  
 255 directly use it as the  $p$ -value to infer the association status due to their different definitions and  
 256 properties.

257

258 The following relationship between Jlfd<sub>r</sub> and false discovery rates (Fdr) was shown in Jiang and  
 259 Yu (39),

260 
$$\text{Fdr}_1(\mathcal{R}) = E(\text{Jlfd}_1(Y_1, Y_2) | (Y_1, Y_2) \in \mathcal{R}) \approx \frac{1}{|\{(Y_{i1}, Y_{i2}) \in \mathcal{R}\}|} \sum_{(Y_{i1}, Y_{i2}) \in \mathcal{R}} \text{Jlfd}_1(Y_{i1}, Y_{i2}),$$

261 where the rejection region is the set of two-dimensional vector  $(Y_1, Y_2)$  such that the null  
262 hypothesis can be rejected based on a specific rejection criterion. For example, we can specify  
263 a rejection criterion to select genes with large values of the weighted average DNM  
264 counts:  $0.9Y_1 + 0.1Y_2 \geq 5$ , then the corresponding rejection region is the upper right region above  
265 the line of  $0.9Y_1 + 0.1Y_2 = 5$ . Here we omit the gene indicator  $i$  since the rejection region is  
266 defined on DNM count pairs of two traits regardless of the exact gene labels. Jiang and Yu (56)  
267 showed that the most powerful rejection region for a given Fdr level  $q$  is  $\{\text{Jlfd}_1(Y_1, Y_2) \leq t(q)\}$ .  
268 To determine the threshold  $t(q)$ , we sort the calculated  $\text{Jlfd}_1$  value of each gene in an  
269 ascending order first. Denote the  $a$ -th  $\text{Jlfd}_1$  value as  $\text{Jlfd}_1^a$ . We can approximate the Fdr of the  
270 region  $\mathcal{R}_a = \{(Y_1, Y_2) | \text{Jlfd}_1(Y_{i1}, Y_{i2}) \leq \text{Jlfd}_1^a\}$  as

$$\text{Fdr}(\mathcal{R}_a) = \frac{1}{a} \sum_{b=1}^a \text{Jlfd}_1^b$$

271 Denote  $c = \max \{a | \text{Fdr}(\mathcal{R}_a) \leq q\}$ , and then the threshold  $t(q)$  for  $\text{Jlfd}_1$  is  $\text{Jlfd}_1^c$ . For testing  
272 association with the first trait, we reject all genes with  $\text{Jlfd}_1(Y_{i1}, Y_{i2}) \leq t(q)$ . For both simulation  
273 and real data analyses, the global Fdr is controlled at  $q = 0.05$ . The global Fdr is abbreviated as  
274 FDR in the following text.

275

### 276 **Implementation of mTADA**

277 We used extTADA [11] to estimate the hyperpriors input for mTADA. For simulation and real  
278 data application, we applied 2 MCMC chains and 10,000 iterations as recommended by the  
279 authors [23]. We applied  $\text{PP} > 0.8$  as the threshold for risk gene inference. We benchmarked the  
280 computational time of mTADA and M-DATA on Intel Xeon Gold 6240 processors (2.6GHZ).-

281

## 282 Misspecified Model

283 We tested if M-DATA have proper power when functional annotations affect the latent variables  
 284  $Z_{il}, l \in \{00,01,10,11\}$  rather than the relative risk parameters  $\gamma_{i1}$  and  $\gamma_{i2}$ . Further, we assumed  
 285 that the latent variable  $Z_{i10}$  is associated with the functional annotation vector  $X_{i1}$ , which is the  
 286 functional annotation vector for gene  $i$  of the first trait,  $Z_{i01}$  is associated with  $X_{i2}$ , which is the  
 287 functional annotation vector for gene  $i$  of the second trait, and  $Z_{i11}$  is associated with both  $X_{i1}$   
 288 and  $X_{i2}$  through the following forms:

$$P(Z_{i00}) = \frac{1}{1 + \exp(X_{i1}^T \beta_1) + \exp(X_{i2}^T \beta_2) + \exp(X_{i1}^T \beta_1 + X_{i2}^T \beta_2)}$$

$$P(Z_{i10}) = \frac{\exp(X_{i1}^T \beta_1)}{1 + \exp(X_{i1}^T \beta_1) + \exp(X_{i2}^T \beta_2) + \exp(X_{i1}^T \beta_1 + X_{i2}^T \beta_2)}$$

$$P(Z_{i01}) = \frac{\exp(X_{i2}^T \beta_2)}{1 + \exp(X_{i1}^T \beta_1) + \exp(X_{i2}^T \beta_2) + \exp(X_{i1}^T \beta_1 + X_{i2}^T \beta_2)}$$

$$P(Z_{i11}) = \frac{\exp(X_{i1}^T \beta_1 + X_{i2}^T \beta_2)}{1 + \exp(X_{i1}^T \beta_1) + \exp(X_{i2}^T \beta_2) + \exp(X_{i1}^T \beta_1 + X_{i2}^T \beta_2)}$$

289  $\pi_{00} = \Pr(Z_{i00} = 1), Y_{i1}|Z_{i00} \sim \text{Poisson}(2N_1\mu_i), Y_{i2}|Z_{i00} \sim \text{Poisson}(2N_2\mu_i)$

290  $\pi_{10} = \Pr(Z_{i10} = 1), Y_{i1}|Z_{i10} \sim \text{Poisson}(2N_1\mu_i\gamma_{i1}), Y_{i2}|Z_{i10} \sim \text{Poisson}(2N_2\mu_i)$

291  $\pi_{01} = \Pr(Z_{i01} = 1), Y_{i1}|Z_{i01} \sim \text{Poisson}(2N_1\mu_i), Y_{i2}|Z_{i01} \sim \text{Poisson}(2N_2\mu_i\gamma_{i2})$

292  $\pi_{11} = \Pr(Z_{i11} = 1), Y_{i1}|Z_{i11} \sim \text{Poisson}(2N_1\mu_i\gamma_{i1}), Y_{i2}|Z_{i11} \sim \text{Poisson}(2N_2\mu_i\gamma_{i2}),$

293 where  $\pi$  is the corresponding risk proportion of genes belonging to each class, with

294  $\sum_{l \in \{00,10,01,11\}} \pi_l = 1$ . Here,  $\mu_i$  is the mutability of gene  $i$ .  $N_1, \gamma_{i1}$  and  $X_{i1}$  are the case cohort size,

295 relative risk and annotation vector of gene  $i$  for the first trait. Similarly,  $N_2, \gamma_{i2}$  and  $X_{i2}$  are

296 defined for the second trait.

297

## 298 Verification and Comparison

## 299 **Estimation Evaluation**

300 We conducted comprehensive simulation studies to evaluate the estimation and power  
301 performance of M-DATA. We set the total number of genes  $M$  to 10,000, where genes were  
302 randomly selected from gnomAD v2.1 [31]. We set the size of the case cohort at 2000, 5000  
303 and 10000, corresponding to a small, medium and large WES study. We assumed the  
304 proportion of risk genes to be 0.1 for each trait (i.e.,  $\pi_{10} + \pi_{11} = \pi_{01} + \pi_{11} = 0.1$ ), and varied the  
305 shared risk proportion  $\pi_{11}$  at 0.01, 0.03, 0.05, 0.07 and 0.09. When  $\pi_{11} = 0.01$ , it corresponds to  
306 the absence of pleiotropy between two traits, and we expect our multi-trait models to perform  
307 similarly as our single-trait models.

308  
309 We first evaluated the performance of estimation for our models, and then we conducted power  
310 analysis for our single-trait models and multi-trait models. To evaluate the estimation  
311 performance for multi-trait models, we simulated the true model with two Bernoulli annotations,  
312 and set the parameter of the Bernoulli distributions to 0.5 for both traits. We varied the effect  
313 sizes of annotations  $(\beta_{j0}, \beta_{j1}, \beta_{j2}), j = 1, 2$  from  $(3, 0.1, 0.1)$   $(3, 0.1, 0)$  and  $(3, 0, 0)$ , which  
314 corresponds to the cases when both annotations are effective, only the first annotation is  
315 effective and no annotation is effective. We evaluated the estimates of shared proportion of risk  
316 genes  $\pi_{11}$  and the risk gene proportion for a single trait. There are in total 27 simulation settings  
317 for estimation evaluation. To obtain an empirical distribution of our estimated parameters, we  
318 replicated the process for 50 times for each setting. We simulated the two traits in a symmetrical  
319 way, so we only present the results of the first trait. The performance of estimation under the  
320 scenario that both annotations are effective  $((\beta_{j1}, \beta_{j2}) = (0.1, 0.1), j = 1, 2)$  are shown in Fig 1.  
321 The rest of scenarios are shown in Fig A in the S1 Text.

322

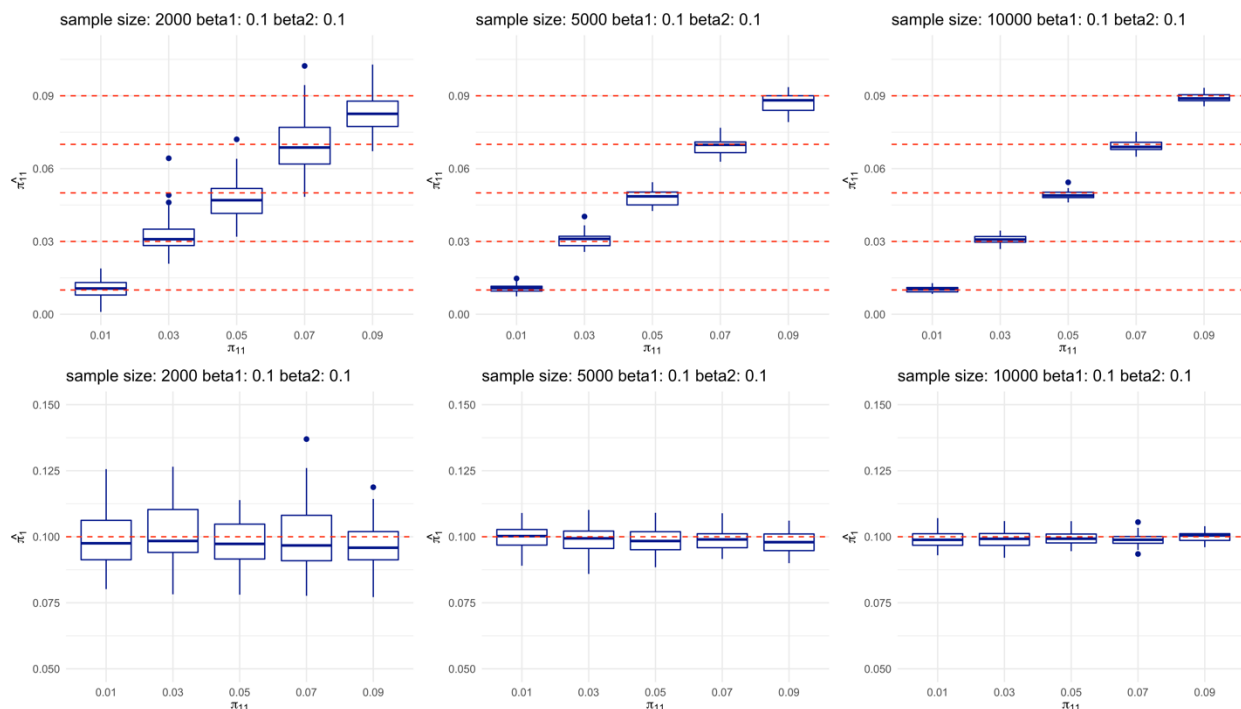

323

324 **Fig 1. Multi-trait analysis can accurately estimate the proportion of shared risk genes and single-trait risk**  
 325 **genes.** Top panels show the estimation of shared risk proportion, and bottom panels show the estimation of a single  
 326 trait. For each panel, each plot from left to right represents study sample size of 2000, 5000, and 10000, respectively.  
 327 Within each plot, boxes from left to right represent the proportion of shared risk genes being 0.01, 0.03, 0.05, 0.07  
 328 and 0.09, respectively. Each scenario is replicated for 50 times in our simulations. True values are shown in red  
 329 dashed lines.

330

### 331 **Power Evaluation**

332 Given that the effective number of functional annotations for DNM data in real world is unknown,  
 333 we explored the power performance of single-trait and multi-trait models when annotations are  
 334 only partially observed. We varied the effect size of annotations from  
 335 and , which corresponds to the cases when effect of  
 336 annotations is weak, moderate, and strong. We assumed that only the first two annotations can  
 337 be observed. We first demonstrated our model can control FDR (Fig B in the S1 Text) under  
 338 these settings and then evaluated power (Fig 2), type I error (Fig C in the S1 Text), and AUC  
 339 (Fig D in the S1 Text) for our single-trait models and multi-trait models. There are in total 45



340 simulation settings. Under each setting, the data were simulated based on our multi-trait model  
341 with annotations (Methods).

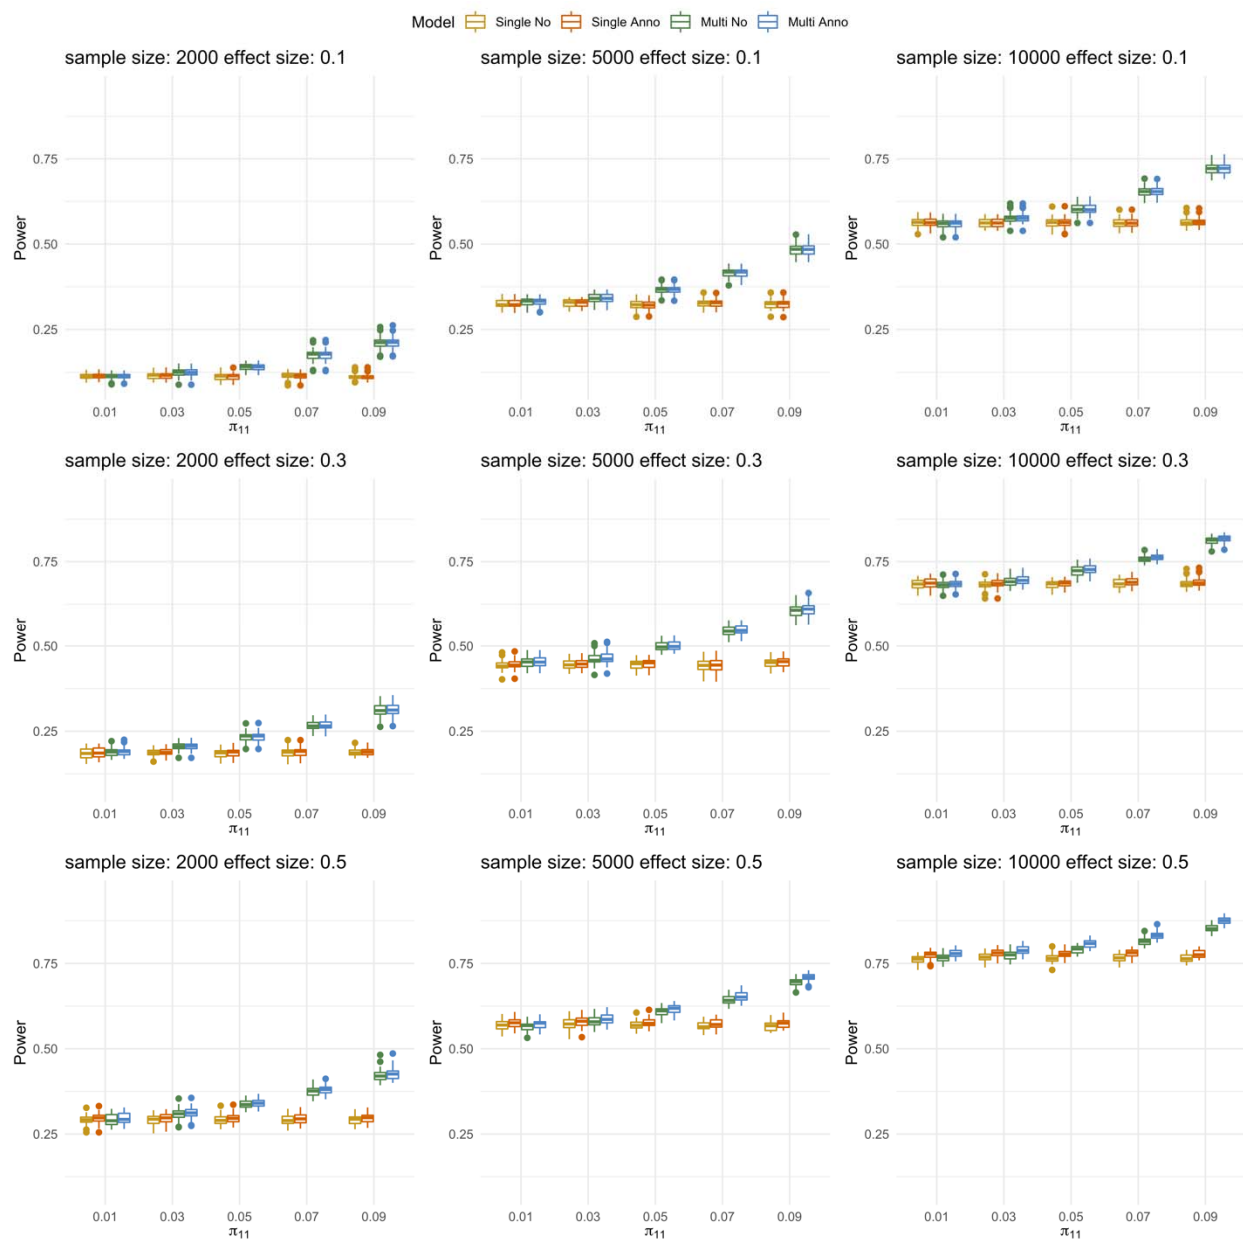

342  
343 **Fig 2. Power performance under different strengths of annotations.** The panels from top to bottom show the  
344 power performance under weak, moderate and strong annotations, respectively. For each panel, each plot from left to  
345 right represents study sample size of 2000, 5000, and 10000, respectively. Within each plot, boxes from left to right  
346 represent the proportion of shared risk genes being 0.01, 0.03, 0.05, 0.07 and 0.09, respectively. Each scenario is  
347 replicated for 50 times in our simulations.  
348

349 With the increase of the sample size, the performance of all four models becomes better. Under  
350 weak annotations, the power performance of models with annotations and without annotations  
351 are comparable. However, when annotations are stronger, the power performance of models  
352 with annotations are better than models without annotations (Fig E and Fig F in the S1 Text).  
353 With the increase of shared risk proportion, the power performance of multi-trait models become  
354 better than single-trait models.

355

### 356 **Comparison with mTADA**

357 Under the same settings in the previous section, we compared the power performance of  
358 mTADA and M-DATA. The sample size of the DNM cohort was set as 5000 for both traits. In the  
359 simulation, we observed that both methods could control FDR, while mTADA was more  
360 conservative than M-DATA for FDR control (Fig G in the S1 Text). M-DATA has higher power  
361 than mTADA when the effect size of annotations is larger (Fig 3). The result is consistent with  
362 our observation in the real data (Application). In the time comparison, we observed that our  
363 method converged faster than the MCMC method adopted by mTADA (Table D in the S1 Text).

364

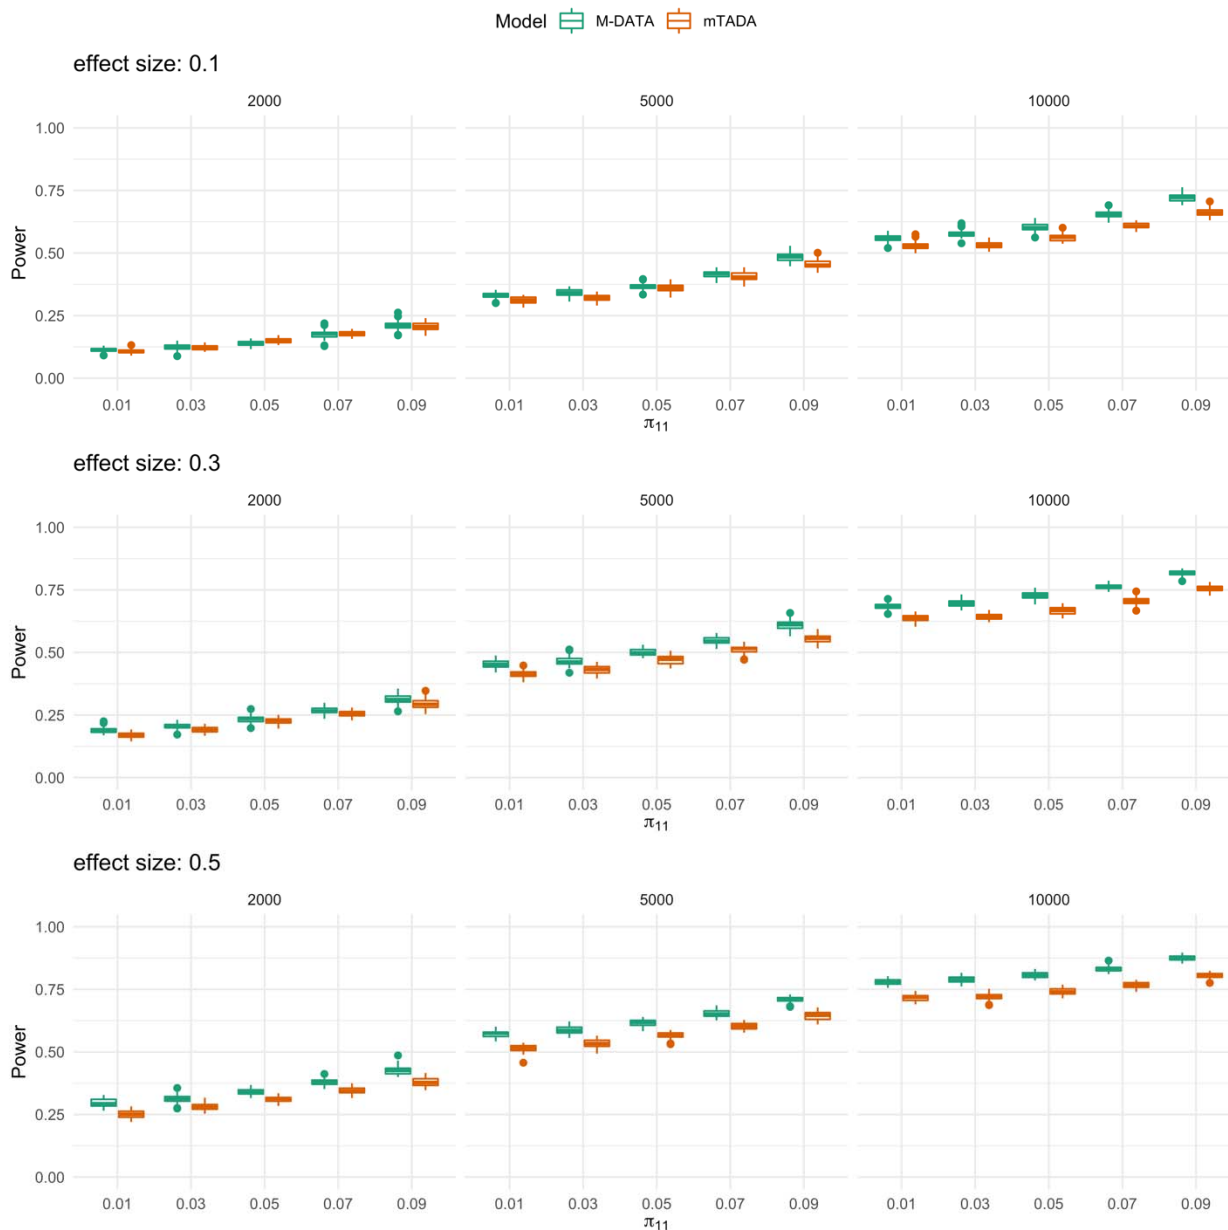

365

366 **Fig 3. Comparisons of M-DATA and mTADA under different strengths of annotations.** The panels from top to  
367 bottom show the power performance under weak, moderate and strong annotations, respectively. For each panel,  
368 each plot from left to right represents study sample size of 2000, 5000, and 10000, respectively. Within each plot,  
369 boxes from left to right represent the proportion of shared risk genes being 0.01, 0.03, 0.05, 0.07 and 0.09,  
370 respectively. Each scenario is replicated for 50 times in our simulations.

371

372 **Robustness to Model Misspecification**

373 We also evaluated the power performance of M-DATA under misspecified models (Methods),  
374 where we simulated two Bernoulli annotations that affect the latent variables  
375  $Z_{il}, l \in \{00,10,01,11\}$ , and set the parameter of the Bernoulli distributions to 0.5 for both traits.  
376 We varied the effect sizes of annotations on the latent variables  $(\beta_{j0}, \beta_{j1}, \beta_{j2}), j = 1,2$  at (-  
377 3,0.5,0.5), (-3,1,1) and (-3,1.5,1.5), which corresponds to the case when the effect of  
378 annotations is weak, moderate, and strong, respectively. The relative risk parameters  $\gamma_{i1}$  and  
379  $\gamma_{i2}$  were set at 25. We simulated DNM counts under this misspecified model and evaluated the  
380 performance of M-DATA multi-trait models for different sizes of DNM cohort (1000, 2000, and  
381 4000). We observed that M-DATA can control FDR under all settings and the multi-trait model  
382 with annotations had better power than the multi-trait model without annotation with the increase  
383 of the effect size of annotations (Fig 4).

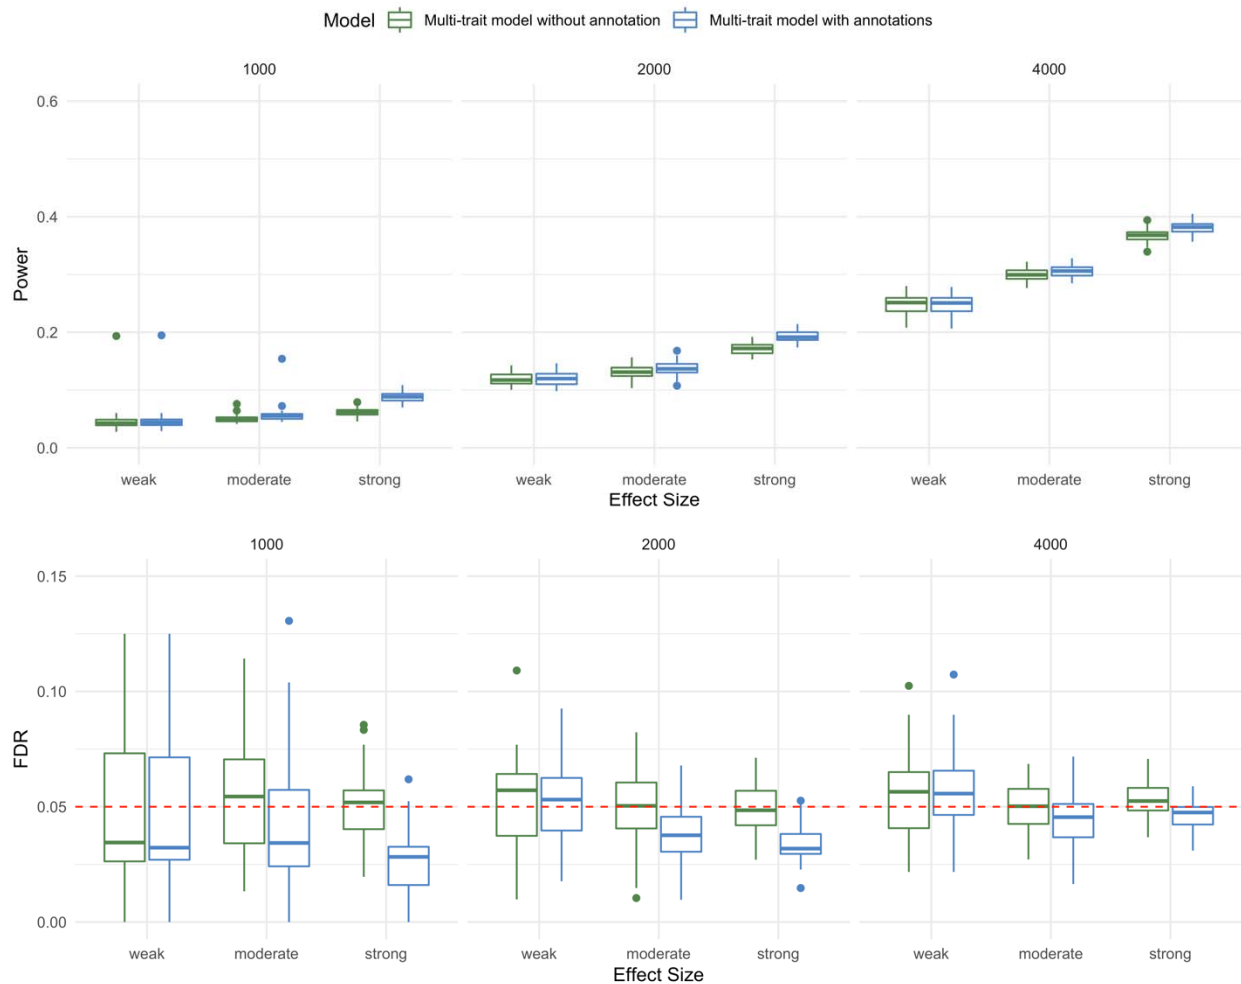

384

385 **Fig 4. Power and FDR of M-DATA under model misspecification.** The top panel and bottom panel show the  
386 power and FDR under weak, moderate and strong annotations on the latent variables  
387 respectively. For each panel, each plot from left to right represents study sample size of 1000, 2000, and 4000,  
388 respectively. Each scenario is replicated for 50 times in our simulations.

389

## 390 Application

391 We applied M-DATA to real DNM data from 2,645 CHD probands reported in Jin et al. [4] and  
392 5,623 autism probands acquired from denovo-db [40]. We only considered damaging mutations  
393 (LoF and Dmis) in our analysis as the number of non-deleterious mutations is not expected to  
394 provide information to differentiate cases from controls biologically [41]. Details of functional

395 annotation and feature selection are included in Methods and S1 Text. In total, there were  
396 18,856 genes tested by M-DATA.

397  
398 We performed single-trait analysis on CHD and autism data separately, followed by joint  
399 analysis both CHD and autism data with the multi-trait models. We compared the performance  
400 of single-trait models and multi-trait models for CHD under different significance thresholds.  
401 With a stringent significance threshold (i.e., FDR < 0.01), single-trait model without annotation  
402 identified 8 significant genes, single-trait model with annotation identified 10 significant genes,  
403 multi-trait model without annotation identified 11 significant genes, and multi-trait model with  
404 annotation identified 14 genes. With FDR < 0.05, single-trait model without annotation identified  
405 15 significant genes, single-trait model with annotation identified 19 significant genes, multi-trait  
406 model without annotation identified 18 significant genes, and multi-trait model with annotation  
407 identified 23 significant genes (Table 1). It demonstrates that M-DATA is able to identify more  
408 genes by jointly analyzing multiple traits and incorporating information from functional  
409 annotations. We visualized the identified genes with Venn diagrams (Fig 5 and Fig H in Text S1).

| Model                        | FDR<0.05 | FDR<0.01 |
|------------------------------|----------|----------|
| Single no Anno: CHD/Autism   | 15/28    | 8/17     |
| Single with Anno: CHD/Autism | 19/35    | 10/22    |
| Multi no Anno: CHD/Autism    | 18/28    | 11/19    |
| Multi with Anno: CHD/Autism  | 23/37    | 14/23    |

410 **Table 1. Results for M-DATA Single-Trait and Multi-Trait Models**

411  
412 We further demonstrate the results by taking CHD as an example. Compared with the single-  
413 trait model without annotation, the multi-trait model without annotation identified 3 additional  
414 genes, which are *FRYL*, *NAA15* and *PTEN*. Compared with the single-trait model with  
415 annotations, the multi-trait model with annotations identified 6 additional genes, including

416 *CDK13*, *FRYL*, *LZTR1*, *NAA15*, *PTEN* and *RPL5*. There are two additional genes identified by  
417 the single-trait model with annotations, but not the multi-trait models. Both of these two genes  
418 did not have DNMs in autism and are around the margin of FDR threshold (0.05) for the multi-  
419 trait model with annotations (*AHNAK* 0.056, *MYH6* 0.061).  
420

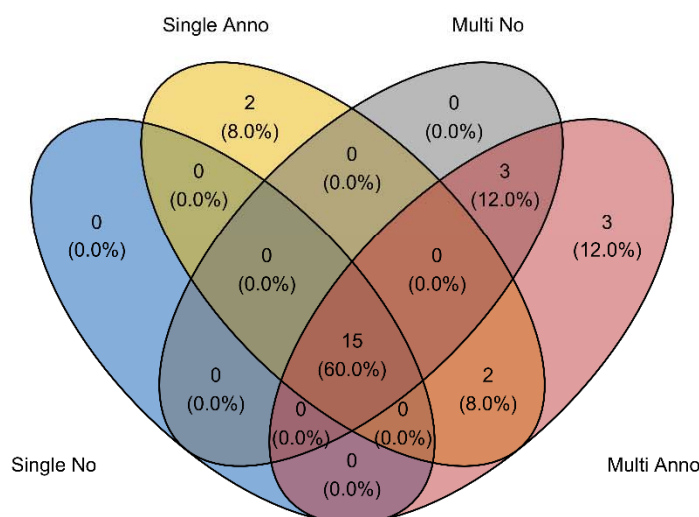

421  
422 **Fig 5. Venn diagram of identified genes in different models.** Compared to the single-trait model without  
423 annotation, the single-trait model with annotations identified 4 additional genes. Compared to the multi-trait model  
424 without annotation, the multi-trait model with annotations identified 5 additional genes. In total, the multi-trait models  
425 identified 6 different genes compared to the single-trait models, including 4 novel human CHD genes (*CDK13*, *FRYL*,  
426 *LZTR1* and *NAA15*).

427  
428 To further illustrate the gain of power from multi-trait analysis, we visualized the posterior  
429 probability of being shared risk gene for CHD and autism of identified genes in the multi-trait  
430 model with annotations in Fig 6A (CHD) and Fig I in the S1 Text (autism). In the main text, we  
431 further illustrate the results with the 23 significant CHD genes. All genes identified by the multi-

432 trait models are annotated with gene names, and the 6 additional genes identified by multi-trait  
 433 analyses are colored red. From this figure, we can see that most genes (5/6) have high  
 434 posterior probability of being shared. *RPL5* is at the margin of FDR threshold in the single-trait  
 435 models and may be prioritized in the multi-trait models by chance (Fig 6B). In addition, we  
 436 checked the correlation between the FDR of top genes identified by the multi-trait model with  
 437 annotations in the single-trait model with annotations (Fig 6B). All 6 genes have low FDR (<0.2)  
 438 in the single-trait model with annotations, which indicates multi-trait analysis can prioritize  
 439 marginal signals in single-trait analysis.  
 440

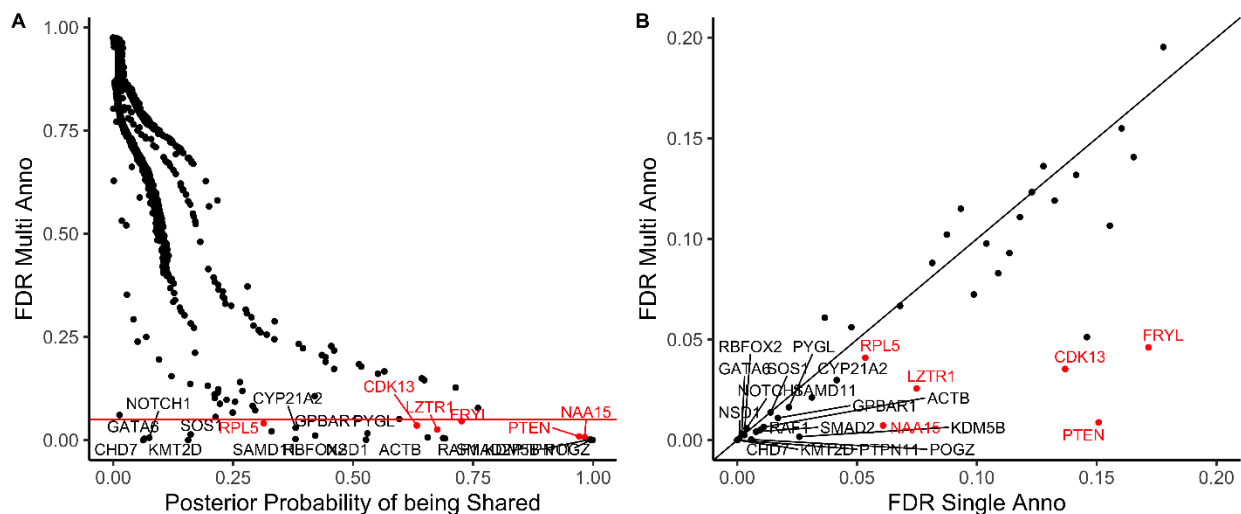

441 **Fig 6. Multi-trait analyses prioritized additional genes with high posterior probability of being shared**  
 442 **genes for CHD.** Gene names of the 23 genes identified by the multi-trait model with annotations are shown on the  
 443 plot and the additional 6 genes that were identified by the multi-trait models are marked in red. (A) shows that the 6  
 444 additional genes identified by the multi-trait models had high posterior probability of being shared. The x-axis  
 445 represents the posterior probability of being shared calculated from the multi-trait model with annotations. The y-axis  
 446 represents the FDR of genes calculated from the multi-trait model with annotations. (B) shows that the top genes in  
 447 the multi-trait model with annotations also had low FDR (<0.2) in the single-trait model with annotations. The x-axis  
 448 represents the FDR of genes calculated from the single-trait model with annotations. The y-axis represents the FDR  
 449 of genes calculated from the multi-trait model with annotations.  
 450



451 We take the 5 CHD genes identified by the multi-trait models, but not the single-trait models as  
452 examples to demonstrate the pleiotropic effect. We selected the DNM counts of CHD and  
453 autism, FDR of the single-trait model with annotations and FDR of the multi-trait model with  
454 annotations model from the results (Table 2). From this table, we can see *CDK13*, *FRYL*,  
455 *LZTR1*, *NAA15* and *PTEN* have 2 DNM counts for CHD and at least 1 shared DNM count with  
456 autism. For *PTEN*, it has 4 shared counts with autism, and we can see a substantial increase of  
457 significance in terms of FDR. Thus, the insight is that genes with shared counts with autism are  
458 more likely to be prioritized for CHD in multi-trait analyses by leveraging the pleiotropic effect.

| <b>Gene</b>  | <b>CHD Counts</b> | <b>Autism Counts</b> | <b>FDR Single Anno</b> | <b>FDR Multi Anno</b> |
|--------------|-------------------|----------------------|------------------------|-----------------------|
| <i>CDK13</i> | 2                 | 1                    | 0.137                  | 0.0353                |
| <i>FRYL</i>  | 2                 | 2                    | 0.172                  | 0.0461                |
| <i>LZTR1</i> | 2                 | 1                    | 0.0749                 | 0.0257                |
| <i>NAA15</i> | 2                 | 3                    | 0.0609                 | 0.00726               |
| <i>PTEN</i>  | 2                 | 4                    | 0.151                  | 0.00882               |

459 **Table 2. Pleiotropic effect boosts power for M-DATA multi-trait models.**

460  
461 Among the 23 identified genes from joint model with annotations, 11 were well established  
462 known CHD genes based on a previously compiled gene list with 254 known CHD genes [4].  
463 They are involved in essential developmental pathways or biological processes, such as Notch  
464 signaling (*NOTCH1*), RAS signaling (*PTPN11*, *RAF1*, *SOS1*), PI3K/AKT signaling (*PTEN*),  
465 chromatin modeling (*CHD7*, *KMT2D*, *NSD1*), transcriptional regulations (*GATA6*), and cell  
466 structural support (*ACTB*, *RPL5*) [42, 43].

467

468 Among the 12 novel genes, *RBFOX2*, *SMAD2*, *CDK13* are three emerging CHD risk genes that  
469 have been recently reported to cause hypoplastic left heart syndrome [9, 44, 45], laterality  
470 defect [1, 46], and septal defects and pulmonary valve abnormalities [47], respectively.

471  
472 Additionally, 4 novel genes, *POGZ*, *KDM5B*, *NAA15*, and *FRYL*, harbored at least two *de novo*  
473 mutations in both CHD and autism cohorts.

474  
475 *POGZ*, encoding a heterochromatin protein 1 alpha-binding protein, participates in chromatin  
476 modeling and gene regulations. It binds to chromatin and facilitates the packaging of DNA onto  
477 chromosomes. *POGZ* damaging *de novo* mutations were strongly linked with autism spectrum  
478 disorders and other neurodevelopmental disorders [48, 49]. Interestingly, one of the reported  
479 mutation carriers also presented cardiac defect [50].

480  
481 *KDM5B* is a lysine-specific histone demethylase. Studies have shown that it regulates H3K4  
482 methylation near promoter and enhancer regions in embryonic stem cells and controls the cell  
483 pluripotency [51, 52]. The deletion of *KDM5B* in mice is neonatal lethal with respiratory failure  
484 and neurodevelopmental defects [53]. Recessive mutations in the gene were associated with  
485 mental retardation (OMIM: 618109) and one reported patient presented atrial septal defect.

486  
487 *NAA15* encodes the auxiliary subunit of N-Alpha-Acetyltransferase 15, which catalyzes one of  
488 the most common post-translational modification essential for normal cell functions. Protein-  
489 truncating mutations in *NAA15* were reported in intellectual disability and autism patients, some  
490 of whom also presented a variety of cardiac abnormalities including ventricular septal defect,  
491 heterotaxy, pulmonary stenosis and tetralogy of Fallot [54].

492

493 *POGZ*, *KDM5B*, and *NAA15* are all highly expressed in developmental heart at mice embryonic  
494 day E14.5 [4]. *POGZ* and *NAA15* are intolerant for both LoF and missense mutations, given that  
495 they have a pLI score > 0.9 and a missense z-score > 3. *KDM5B* is intolerant for missense  
496 mutations with a missense z-score of 1.78. Considering their intolerance of protein-altering  
497 variants, the identification of damaging *de novo* mutations in them is highly unlikely. Therefore,  
498 our analyses suggest that *POGZ*, *KDM5B* and *NAA15* may be considered as new candidate  
499 CHD genes.

500  
501 Furthermore, among the 17 genes with at least one *de novo* mutation in CHD and autism  
502 cohorts, 5 genes (*KMT2D*, *NSD1*, *POGZ*, *SMAD2*, *KDM5B*) play a role in chromatin modeling.  
503 Such high proportion is consistent with previous studies that chromatin modeling-related  
504 transcriptional regulations are essential for both cardiac and neuro-development, and genes  
505 with critical regulatory roles in the process may be pleotropic [9].

506  
507 Further, we compared the performance of M-DATA with mTADA [23] using the same real data  
508 of CHD and autism. We fitted both methods with damaging mutations (LoF and Dmis mutations).  
509 mTADA identified all 18 genes identified by our no annotation model, and missed 3 genes  
510 (*CDK13*, *SAMD11*, and *RPL5*) identified by our annotation model for CHD (Table 2). We  
511 visualized the results with Venn diagrams (Fig 6 and Fig J in the S1 Text). We also compared  
512 our results with the results of CHD-ASD pair reported by mTADA using CHD data [55] autism  
513 data [11], and mutability data downloaded from the github webpage of mTADA (Table E in the  
514 S1 Text).

|        | M-DATA No | M-DATA Anno | mTADA |
|--------|-----------|-------------|-------|
| CHD    | 18        | 23          | 20    |
| Autism | 28        | 37          | 28    |

515 **Table 3. Comparison of M-DATA multi-trait models with mTADA**

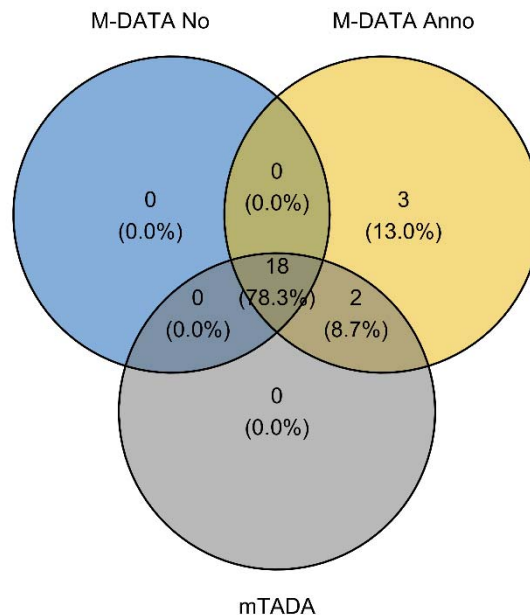

516

517 **Fig 7. Venn diagram of genes identified by M-DATA and mTADA for CHD.** M-DATA multi-trait model with  
518 annotations identified 3 additional genes (*CDK13*, *SAMD11* and *RPL5*).

519

## 520 Discussion

521 In this paper, we have introduced M-DATA, a method to jointly analyze *de novo* mutations from  
522 multiple traits by integrating shared genetic information across traits. The implemented model is  
523 available at <https://github.com/JustinaXie/MADATA>. This approach can increase the effective  
524 sample size for all traits, especially for those with small sample size. M-DATA also provides a  
525 flexible framework to incorporate external functional annotations, either variant-level or gene-  
526 level, which can further improve the statistical power. Through simulation study, we  
527 demonstrated that our multi-trait model with annotations could not only gain accurate estimates  
528 on the proportion of shared risk genes between two traits and the proportion of risk genes for a  
529 single trait under various settings, but also gained statistical power compared to the single-trait  
530 models. In addition, M-DATA adopts the Expectation-Maximization (EM) algorithm in estimation,

531 which does not require prior parameter specification or pre-estimation. In our simulation study,  
532 we found that the algorithm converges faster than methods that use MCMC for estimation  
533 (Table D in the S1 Text).

534  
535 Despite the success, there are some limitations in the current M-DATA model. In our real data  
536 analysis, we used two different data sources for CHD and autism. Samples with both diseases  
537 in our multi-trait analysis may bring bias because of the violation of independence assumption in  
538 our multi-trait models. The autism DNM data in our analysis are from different studies, and  
539 different filtering criteria across studies may also bring bias and dilute our signals. In addition,  
540 we only considered two traits simultaneously. Though it is straightforward to extend our model  
541 to more than two traits, the number of groups (i.e., the dimension of latent variables  $Z_i$ )  
542 increases exponentially with the number of traits ( $2^N$  for N traits) [23]. This might bring difficulty  
543 in estimation and have more computational cost. Model performance with more than two traits  
544 need further exploration. Currently, we did not consider the influence of admixed population in  
545 M-DATA. In a recent study, Kessler et al. studied DNM across 1,465 diverse genomes and  
546 discovered mutation rates may be affected by the environment more significantly than  
547 previously known [56]. Confounding from the environment on mutation rates could be further  
548 explored through cross-ancestry rare variant studies.

549  
550 In conclusion, M-DATA is a novel and powerful approach to performing gene-based association  
551 analysis for DNMs across multiple traits. Not only does M-DATA have better statistical power  
552 than single-trait methods, it also provides reasonable estimation of shared proportion of risk  
553 genes between two traits, which gives novel insights in the understanding of disease  
554 mechanism. We have successfully applied M-DATA to study CHD, which identified significant  
555 23 genes for our multi-trait model with annotations. Moreover, our method provides a general  
556 framework in extending single-trait method to multi-trait method which can also incorporate

557 information from functional annotations. Recently, there are several advancements in the  
558 association analysis for rare variants, such as jointly analyzing DNMs and transmitted variants  
559 [41], analyzing DNMs from whole-genome sequencing (WGS) data [25], and incorporating  
560 pathway information [57]. Extension of these methods to multi-trait analysis is a potential future  
561 direction.

562

### 563 ***Ethics Statement***

564 This study is approved by Yale Human Research Protection Program Institutional Review  
565 Boards (IRB protocol ID 2000028735).

566

## 567 **Supporting Information**

568 **S1 Table. Simulation of Estimation and Power Evaluation.**

569 **S2 Table. Simulation of Comparison with mTADA.**

570 **S3 Table. Results of Real Data Application.**

571 **S1 Text. Supplementary Notes on Methods and Results.**

572

## 573 **Acknowledgements**

574 Supported in part by NIH grant R03HD100883-01A1. We thank Dr. Sheng Chih (Peter) Jin,  
575 Geyu Zhou and Hanmin Guo for helpful discussions.

576

## 577 **References**

- 578 1. Zaidi S, Choi M, Wakimoto H, Ma L, Jiang J, Overton JD, et al. De novo mutations in  
579 histone-modifying genes in congenital heart disease. *Nature*. 2013;498(7453):220-3. Epub  
580 2013/05/12. doi: 10.1038/nature12141. PubMed PMID: 23665959.
- 581 2. Postma AV, Bezzina CR, Christoffels VM. Genetics of congenital heart disease: the  
582 contribution of the noncoding regulatory genome. *Journal of Human Genetics*. 2016;61(1):13-9.  
583 doi: 10.1038/jhg.2015.98.
- 584 3. Wienke A, Herskind AM, Christensen K, Skytthe A, Yashin AI. The heritability of CHD  
585 mortality in danish twins after controlling for smoking and BMI. *Twin Res Hum Genet*.  
586 2005;8(1):53-9. Epub 2005/04/20. doi: 10.1375/1832427053435328. PubMed PMID: 15836811.
- 587 4. Jin SC, Homsy J, Zaidi S, Lu Q, Morton S, DePalma SR, et al. Contribution of rare inherited  
588 and de novo variants in 2,871 congenital heart disease probands. *Nat Genet*. 2017;49(11):1593-  
589 601. Epub 2017/10/11. doi: 10.1038/ng.3970. PubMed PMID: 28991257; PubMed Central  
590 PMCID: PMC5675000.
- 591 5. Sanders SJ, Murtha MT, Gupta AR, Murdoch JD, Raubeson MJ, Willsey AJ, et al. De novo  
592 mutations revealed by whole-exome sequencing are strongly associated with autism. *Nature*.  
593 2012;485(7397):237-41. Epub 2012/04/13. doi: 10.1038/nature10945. PubMed PMID:  
594 22495306; PubMed Central PMCID: PMC3667984.
- 595 6. He X, Sanders SJ, Liu L, De Rubeis S, Lim ET, Sutcliffe JS, et al. Integrated model of de  
596 novo and inherited genetic variants yields greater power to identify risk genes. *PLoS Genet*.  
597 2013;9(8):e1003671. Epub 2013/08/24. doi: 10.1371/journal.pgen.1003671. PubMed PMID:  
598 23966865; PubMed Central PMCID: PMC3744441.
- 599 7. Coe BP, Stessman HAF, Sulovari A, Geisheker MR, Bakken TE, Lake AM, et al.  
600 Neurodevelopmental disease genes implicated by de novo mutation and copy number variation  
601 morbidity. *Nature Genetics*. 2019;51(1):106-16. doi: 10.1038/s41588-018-0288-4.
- 602 8. Zhernakova A, Stahl EA, Trynka G, Raychaudhuri S, Festen EA, Franke L, et al. Meta-  
603 analysis of genome-wide association studies in celiac disease and rheumatoid arthritis identifies  
604 fourteen non-HLA shared loci. *PLoS Genet*. 2011;7(2):e1002004. Epub 2011/03/09. doi:  
605 10.1371/journal.pgen.1002004. PubMed PMID: 21383967; PubMed Central PMCID:  
606 PMC3044685.
- 607 9. Homsy J, Zaidi S, Shen Y, Ware JS, Samocha KE, Karczewski KJ, et al. De novo mutations  
608 in congenital heart disease with neurodevelopmental and other congenital anomalies. *Science*.  
609 2015;350(6265):1262-6. Epub 2016/01/20. doi: 10.1126/science.aac9396. PubMed PMID:  
610 26785492; PubMed Central PMCID: PMC4890146.
- 611 10. Willsey AJ, Morris MT, Wang S, Willsey HR, Sun N, Teerikorpi N, et al. The Psychiatric Cell  
612 Map Initiative: A Convergent Systems Biological Approach to Illuminating Key Molecular  
613 Pathways in Neuropsychiatric Disorders. *Cell*. 2018;174(3):505-20. Epub 2018/07/28. doi:  
614 10.1016/j.cell.2018.06.016. PubMed PMID: 30053424; PubMed Central PMCID:  
615 PMC6247911.
- 616 11. Nguyen HT, Bryois J, Kim A, Dobbyn A, Huckins LM, Munoz-Manchado AB, et al.  
617 Integrated Bayesian analysis of rare exonic variants to identify risk genes for schizophrenia and  
618 neurodevelopmental disorders. *Genome Med*. 2017;9(1):114. Epub 2017/12/22. doi:  
619 10.1186/s13073-017-0497-y. PubMed PMID: 29262854; PubMed Central PMCID:  
620 PMC5738153.

- 621 12. Li J, Cai T, Jiang Y, Chen H, He X, Chen C, et al. Genes with de novo mutations are shared  
622 by four neuropsychiatric disorders discovered from NPdenovo database. *Mol Psychiatry*.  
623 2016;21(2):290-7. Epub 2015/04/08. doi: 10.1038/mp.2015.40. PubMed PMID: 25849321;  
624 PubMed Central PMCID: PMC4837654.
- 625 13. Giambartolomei C, Vukcevic D, Schadt EE, Franke L, Hingorani AD, Wallace C, et al.  
626 Bayesian test for colocalisation between pairs of genetic association studies using summary  
627 statistics. *PLoS Genet*. 2014;10(5):e1004383. Epub 2014/05/17. doi:  
628 10.1371/journal.pgen.1004383. PubMed PMID: 24830394; PubMed Central PMCID:  
629 PMC4022491.
- 630 14. Solovieff N, Cotsapas C, Lee PH, Purcell SM, Smoller JW. Pleiotropy in complex traits:  
631 challenges and strategies. *Nat Rev Genet*. 2013;14(7):483-95. Epub 2013/06/12. doi:  
632 10.1038/nrg3461. PubMed PMID: 23752797; PubMed Central PMCID: PMC4104202.
- 633 15. Chung D, Yang C, Li C, Gelernter J, Zhao H. GPA: a statistical approach to prioritizing  
634 GWAS results by integrating pleiotropy and annotation. *PLoS Genet*. 2014;10(11):e1004787.  
635 Epub 2014/11/14. doi: 10.1371/journal.pgen.1004787. PubMed PMID: 25393678; PubMed  
636 Central PMCID: PMC4230845.
- 637 16. Flutre T, Wen X, Pritchard J, Stephens M. A statistical framework for joint eQTL analysis  
638 in multiple tissues. *PLoS Genet*. 2013;9(5):e1003486. Epub 2013/05/15. doi:  
639 10.1371/journal.pgen.1003486. PubMed PMID: 23671422; PubMed Central PMCID:  
640 PMC3649995.
- 641 17. Sul JH, Han B, Ye C, Choi T, Eskin E. Effectively identifying eQTLs from multiple tissues by  
642 combining mixed model and meta-analytic approaches. *PLoS Genet*. 2013;9(6):e1003491. Epub  
643 2013/06/21. doi: 10.1371/journal.pgen.1003491. PubMed PMID: 23785294; PubMed Central  
644 PMCID: PMC3681686.
- 645 18. Duong D, Gai L, Snir S, Kang EY, Han B, Sul JH, et al. Applying meta-analysis to genotype-  
646 tissue expression data from multiple tissues to identify eQTLs and increase the number of  
647 eGenes. *Bioinformatics*. 2017;33(14):i67-i74. Epub 2017/09/09. doi:  
648 10.1093/bioinformatics/btx227. PubMed PMID: 28881962; PubMed Central PMCID:  
649 PMC5870567.
- 650 19. Li G, Jima D, Wright FA, Nobel AB. HT-eQTL: integrative expression quantitative trait loci  
651 analysis in a large number of human tissues. *BMC Bioinformatics*. 2018;19(1):95. Epub  
652 2018/03/11. doi: 10.1186/s12859-018-2088-3. PubMed PMID: 29523079; PubMed Central  
653 PMCID: PMC5845327.
- 654 20. Li C, Yang C, Gelernter J, Zhao H. Improving genetic risk prediction by leveraging  
655 pleiotropy. *Hum Genet*. 2014;133(5):639-50. Epub 2013/12/18. doi: 10.1007/s00439-013-1401-  
656 5. PubMed PMID: 24337655; PubMed Central PMCID: PMC3988249.
- 657 21. Maier R, Moser G, Chen GB, Ripke S, Coryell W, Potash JB, et al. Joint analysis of  
658 psychiatric disorders increases accuracy of risk prediction for schizophrenia, bipolar disorder,  
659 and major depressive disorder. *Am J Hum Genet*. 2015;96(2):283-94. Epub 2015/02/03. doi:  
660 10.1016/j.ajhg.2014.12.006. PubMed PMID: 25640677; PubMed Central PMCID:  
661 PMC4320268.
- 662 22. Hu Y, Lu Q, Liu W, Zhang Y, Li M, Zhao H. Joint modeling of genetically correlated  
663 diseases and functional annotations increases accuracy of polygenic risk prediction. *PLoS Genet*.



- 664 2017;13(6):e1006836. Epub 2017/06/10. doi: 10.1371/journal.pgen.1006836. PubMed PMID:  
665 28598966; PubMed Central PMCID: PMC5482506.
- 666 23. Nguyen T-H, Dobbyn A, Brown RC, Riley BP, Buxbaum JD, Pinto D, et al. mTADA is a  
667 framework for identifying risk genes from de novo mutations in multiple traits. *Nature*  
668 *Communications*. 2020;11(1):2929. doi: 10.1038/s41467-020-16487-z.
- 669 24. Lu Q, Yao X, Hu Y, Zhao H. GenoWAP: GWAS signal prioritization through integrated  
670 analysis of genomic functional annotation. *Bioinformatics*. 2016;32(4):542-8. Epub 2015/10/28.  
671 doi: 10.1093/bioinformatics/btv610. PubMed PMID: 26504140; PubMed Central PMCID:  
672 PMC5963360.
- 673 25. Liu Y, Liang Y, Cicek AE, Li Z, Li J, Muhle RA, et al. A Statistical Framework for Mapping  
674 Risk Genes from De Novo Mutations in Whole-Genome-Sequencing Studies. *Am J Hum Genet*.  
675 2018;102(6):1031-47. Epub 2018/05/15. doi: 10.1016/j.ajhg.2018.03.023. PubMed PMID:  
676 29754769; PubMed Central PMCID: PMC5992125.
- 677 26. Butkiewicz M, Blue EE, Leung YY, Jian X, Marcora E, Renton AE, et al. Functional  
678 annotation of genomic variants in studies of late-onset Alzheimer's disease. *Bioinformatics*.  
679 2018;34(16):2724-31. doi: 10.1093/bioinformatics/bty177.
- 680 27. Samocha KE, Robinson EB, Sanders SJ, Stevens C, Sabo A, McGrath LM, et al. A  
681 framework for the interpretation of de novo mutation in human disease. *Nat Genet*.  
682 2014;46(9):944-50. Epub 2014/08/05. doi: 10.1038/ng.3050. PubMed PMID: 25086666;  
683 PubMed Central PMCID: PMC4222185.
- 684 28. Mo Li XZ, Chentian Jin, Sheng Chih Jin, Weilai Dong, Martina Brueckner, Richard Lifton,  
685 Qiongshi Lu, Hongyu Zhao. Integrative modeling of transmitted and *de novo* variants identifies  
686 novel risk genes for congenital heart disease. *Quant Biol*. doi: 10.15302/j-  
687 qb-021-0248.
- 688 29. Yang H, Wang K. Genomic variant annotation and prioritization with ANNOVAR and  
689 wANNOVAR. *Nat Protoc*. 2015;10(10):1556-66. Epub 2015/09/18. doi: 10.1038/nprot.2015.105.  
690 PubMed PMID: 26379229; PubMed Central PMCID: PMC4718734.
- 691 30. Kim S, Jhong J-H, Lee J, Koo J-Y. Meta-analytic support vector machine for integrating  
692 multiple omics data. *BioData Mining*. 2017;10(1):2. doi: 10.1186/s13040-017-0126-8.
- 693 31. Karczewski KJ, Francioli LC, Tiao G, Cummings BB, Alföldi J, Wang Q, et al. The  
694 mutational constraint spectrum quantified from variation in 141,456 humans. *Nature*.  
695 2020;581(7809):434-43. doi: 10.1038/s41586-020-2308-7.
- 696 32. Moon TK. The expectation-maximization algorithm. *IEEE Signal Processing Magazine*.  
697 1996;13(6):47-60. doi: 10.1109/79.543975.
- 698 33. Adzhubei I, Jordan DM, Sunyaev SR. Predicting functional effect of human missense  
699 mutations using PolyPhen-2. *Curr Protoc Hum Genet*. 2013;Chapter 7:Unit7.20. Epub  
700 2013/01/15. doi: 10.1002/0471142905.hg0720s76. PubMed PMID: 23315928; PubMed Central  
701 PMCID: PMC4480630.
- 702 34. Samocha KE, Kosmicki JA, Karczewski KJ, O'Donnell-Luria AH, Pierce-Hoffman E,  
703 MacArthur DG, et al. Regional missense constraint improves variant deleteriousness prediction.  
704 *BioRxiv*. 2017:148353.
- 705 35. Kircher M, Witten DM, Jain P, O'Roak BJ, Cooper GM, Shendure J. A general framework  
706 for estimating the relative pathogenicity of human genetic variants. *Nat Genet*. 2014;46(3):310-

- 707 5. Epub 2014/02/04. doi: 10.1038/ng.2892. PubMed PMID: 24487276; PubMed Central PMCID:  
708 PMCPMC3992975.
- 709 36. Ioannidis NM, Rothstein JH, Pejaver V, Middha S, McDonnell SK, Baheti S, et al. REVEL:  
710 An Ensemble Method for Predicting the Pathogenicity of Rare Missense Variants. *Am J Hum*  
711 *Genet.* 2016;99(4):877-85. Epub 2016/09/27. doi: 10.1016/j.ajhg.2016.08.016. PubMed PMID:  
712 27666373; PubMed Central PMCID: PMCPMC5065685.
- 713 37. Jian X, Boerwinkle E, Liu X. In silico prediction of splice-altering single nucleotide variants  
714 in the human genome. *Nucleic Acids Research.* 2014;42(22):13534-44. doi:  
715 10.1093/nar/gku1206.
- 716 38. Xiong HY, Alipanahi B, Lee LJ, Bretschneider H, Merico D, Yuen RKC, et al. The human  
717 splicing code reveals new insights into the genetic determinants of disease. *Science.*  
718 2015;347(6218):1254806. doi: 10.1126/science.1254806.
- 719 39. Jiang W, Yu W. Controlling the joint local false discovery rate is more powerful than  
720 meta-analysis methods in joint analysis of summary statistics from multiple genome-wide  
721 association studies. *Bioinformatics.* 2016;33(4):500-7. doi: 10.1093/bioinformatics/btw690.
- 722 40. Turner TN, Yi Q, Krumm N, Huddleston J, Hoekzema K, HA FS, et al. denovo-db: a  
723 compendium of human de novo variants. *Nucleic Acids Res.* 2017;45(D1):D804-d11. Epub  
724 2016/12/03. doi: 10.1093/nar/gkw865. PubMed PMID: 27907889; PubMed Central PMCID:  
725 PMCPMC5210614.
- 726 41. Li M. Gene-based Association Analysis for Genome-wide Association and Whole-exome  
727 Sequencing Studies: Yale University; 2020.
- 728 42. Zaidi S, Brueckner M. Genetics and Genomics of Congenital Heart Disease. *Circ Res.*  
729 2017;120(6):923-40. Epub 2017/03/18. doi: 10.1161/circresaha.116.309140. PubMed PMID:  
730 28302740; PubMed Central PMCID: PMCPMC5557504.
- 731 43. Pierpont ME, Brueckner M, Chung WK, Garg V, Lacro RV, McGuire AL, et al. Genetic  
732 Basis for Congenital Heart Disease: Revisited: A Scientific Statement From the American Heart  
733 Association. *Circulation.* 2018;138(21):e653-e711. Epub 2018/12/21. doi:  
734 10.1161/cir.0000000000000606. PubMed PMID: 30571578; PubMed Central PMCID:  
735 PMCPMC6555769.
- 736 44. McKean DM, Homsy J, Wakimoto H, Patel N, Gorham J, DePalma SR, et al. Loss of RNA  
737 expression and allele-specific expression associated with congenital heart disease. *Nat Commun.*  
738 2016;7:12824. Epub 2016/09/28. doi: 10.1038/ncomms12824. PubMed PMID: 27670201;  
739 PubMed Central PMCID: PMCPMC5052634.
- 740 45. Verma SK, Deshmukh V, Nutter CA, Jaworski E, Jin W, Wadhwa L, et al. Rbfox2 function  
741 in RNA metabolism is impaired in hypoplastic left heart syndrome patient hearts. *Sci Rep.*  
742 2016;6:30896. Epub 2016/08/04. doi: 10.1038/srep30896. PubMed PMID: 27485310; PubMed  
743 Central PMCID: PMCPMC4971515.
- 744 46. Granadillo JL, Chung WK, Hecht L, Corsten-Janssen N, Wegner D, Nij Bijvank SWA, et al.  
745 Variable cardiovascular phenotypes associated with SMAD2 pathogenic variants. *Hum Mutat.*  
746 2018;39(12):1875-84. Epub 2018/08/30. doi: 10.1002/humu.23627. PubMed PMID: 30157302.
- 747 47. Sifrim A, Hitz MP, Wilsdon A, Breckpot J, Turki SH, Thienpont B, et al. Distinct genetic  
748 architectures for syndromic and nonsyndromic congenital heart defects identified by exome  
749 sequencing. *Nat Genet.* 2016;48(9):1060-5. Epub 2016/08/02. doi: 10.1038/ng.3627. PubMed  
750 PMID: 27479907; PubMed Central PMCID: PMCPMC5988037.

- 751 48. Stessman HAF, Willemsen MH, Fenckova M, Penn O, Hoischen A, Xiong B, et al.  
752 Disruption of POGZ Is Associated with Intellectual Disability and Autism Spectrum Disorders. *Am*  
753 *J Hum Genet.* 2016;98(3):541-52. Epub 2016/03/05. doi: 10.1016/j.ajhg.2016.02.004. PubMed  
754 PMID: 26942287; PubMed Central PMCID: PMC4890241.
- 755 49. Matsumura K, Seiriki K, Okada S, Nagase M, Ayabe S, Yamada I, et al. Pathogenic POGZ  
756 mutation causes impaired cortical development and reversible autism-like phenotypes. *Nat*  
757 *Commun.* 2020;11(1):859. Epub 2020/02/28. doi: 10.1038/s41467-020-14697-z. PubMed PMID:  
758 32103003; PubMed Central PMCID: PMC44294 declare no competing interests.
- 759 50. White J, Beck CR, Harel T, Posey JE, Jhangiani SN, Tang S, et al. POGZ truncating alleles  
760 cause syndromic intellectual disability. *Genome Med.* 2016;8(1):3. Epub 2016/01/08. doi:  
761 10.1186/s13073-015-0253-0. PubMed PMID: 26739615; PubMed Central PMCID:  
762 PMC4702300.
- 763 51. Kidder BL, Hu G, Zhao K. KDM5B focuses H3K4 methylation near promoters and  
764 enhancers during embryonic stem cell self-renewal and differentiation. *Genome Biol.*  
765 2014;15(2):R32. Epub 2014/02/06. doi: 10.1186/gb-2014-15-2-r32. PubMed PMID: 24495580;  
766 PubMed Central PMCID: PMC4053761.
- 767 52. Kurup JT, Campeanu IJ, Kidder BL. Contribution of H3K4 demethylase KDM5B to  
768 nucleosome organization in embryonic stem cells revealed by micrococcal nuclease sequencing.  
769 *Epigenetics Chromatin.* 2019;12(1):20. Epub 2019/04/04. doi: 10.1186/s13072-019-0266-9.  
770 PubMed PMID: 30940185; PubMed Central PMCID: PMC6444878.
- 771 53. Albert M, Schmitz SU, Kooistra SM, Malatesta M, Morales Torres C, Rekling JC, et al. The  
772 histone demethylase Jarid1b ensures faithful mouse development by protecting developmental  
773 genes from aberrant H3K4me3. *PLoS Genet.* 2013;9(4):e1003461. Epub 2013/05/03. doi:  
774 10.1371/journal.pgen.1003461. PubMed PMID: 23637629; PubMed Central PMCID:  
775 PMC3630093 other authors have declared that no competing financial interests exist.
- 776 54. Cheng H, Dharmadhikari AV, Varland S, Ma N, Domingo D, Kleyner R, et al. Truncating  
777 Variants in NAA15 Are Associated with Variable Levels of Intellectual Disability, Autism  
778 Spectrum Disorder, and Congenital Anomalies. *Am J Hum Genet.* 2018;102(5):985-94. Epub  
779 2018/04/17. doi: 10.1016/j.ajhg.2018.03.004. PubMed PMID: 29656860; PubMed Central  
780 PMCID: PMC5986698.
- 781 55. Homsy J, Zaidi S, Shen Y, Ware JS, Samocha KE, Karczewski KJ, et al. De novo mutations  
782 in congenital heart disease with neurodevelopmental and other congenital anomalies. *Science*  
783 (New York, NY). 2015;350(6265):1262-6. doi: 10.1126/science.aac9396. PubMed PMID:  
784 26785492.
- 785 56. Kessler MD, Loesch DP, Perry JA, Heard-Costa NL, Taliun D, Cade BE, et al. De novo  
786 mutations across 1,465 diverse genomes reveal mutational insights and reductions in the Amish  
787 founder population. *Proceedings of the National Academy of Sciences.* 2020;117(5):2560-9. doi:  
788 10.1073/pnas.1902766117.
- 789 57. Nguyen TH, He X, Brown RC, Webb BT, Kendler KS, Vladimirov VI, et al. DECO: a  
790 framework for jointly analyzing de novo and rare case/control variants, and biological pathways.  
791 *Brief Bioinform.* 2021. Epub 2021/04/02. doi: 10.1093/bib/bbab067. PubMed PMID: 33791774.  
792
